# Surgical Management of Morbid Obesity

BENJAMIN E. SCHNEIDER, MD  
EDWARD C. MUN, MD

**O**besity imposes devastating health and financial tolls on society and those who suffer from it. Despite the growing awareness of the problem, the obesity epidemic, along with its associated complications, continues to expand at an alarming rate (1). The current nomenclature used to measure an individual's degree of obesity is BMI, which is calculated by dividing weight (in kilograms) by the square of height (in meters) (Table 1). Based on these criteria, the CDC (Centers for Disease Control and Prevention) reports a doubling of the obese population (BMI  $\geq 30$  kg/m<sup>2</sup>) in the period between 1976–1980 and 2001–2002 to reach an estimated number of 63 million obese people. Currently in the U.S., nearly two-thirds of adults are overweight (BMI  $>25$  kg/m<sup>2</sup>), nearly one-third are considered obese (BMI  $\geq 30$  kg/m<sup>2</sup>), and 4.7% are extremely obese (BMI  $\geq 40$  kg/m<sup>2</sup>) (2). The financial cost of obesity in the U.S. is estimated to be in excess of \$100 billion/year (3). In addition to increased risk of diabetes and other comorbid diseases, obese individuals may expect significant decreases in life expectancy (4) (Table 2). This obesity-related diminution in longevity directly contributes to 280,000 deaths annually in the U.S. (5).

Medical (nonsurgical) weight loss therapies include combinations of diet, exercise, behavioral therapies, and medications. In 1998, an NIH (National Institutes of Health) expert panel, upon critical review of the literature, concluded that these modalities, either alone or in combination, can induce modest weight loss that confers health benefits to the patients (6). However, the weight loss induced by these therapies is often short lived. Furthermore, medical management

must continue indefinitely to be effective, or weight regain is common. Such medical therapies have not been shown to be effective in maintaining long-term weight loss in a morbidly obese patient population. Thus, most physicians realize that surgery remains the best option for many morbidly obese patients.

Because severe obesity is associated with increased risk for premature death, the 1991 NIH consensus panel set out guidelines for surgical therapies in patients with extreme obesity (BMI  $>40$  kg/m<sup>2</sup> or 35–40 kg/m<sup>2</sup> with comorbidities) (7) (Table 3). A follow-up NIH consensus meeting was held recently in June 2004, and new recommendations will be available in the near future. A more recent procedure, adjustable gastric banding, is expected to be included in the updated surgical procedures.

## SURGICAL THERAPIES AND OUTCOMES

— In response to the relatively poor durable weight loss experienced by patients undergoing medical treatment for morbid obesity, the demand for weight loss surgery has greatly increased in recent years. The number of bariatric operations performed nationwide increased from 16,000 to  $>100,000$ /year in 2003 (8). More than 140,000 procedures are anticipated for 2004. Numerous surgical techniques were developed over the last 40 years to treat morbid obesity. Some of these procedures evolved with time, whereas others have become obsolete. Bariatric surgical techniques share two fundamental designs: intestinal malabsorption and gastric restriction. Malabsorptive operations shorten the functional length of the intestinal surface for nutrient absorption, while restrictive procedures decrease

food intake by creating a small neogastric pouch and the outlet. The goals of surgery are to achieve and maintain significant weight loss and to reverse or prevent many of the obesity-induced comorbidities. The ideal bariatric procedure must be safe, durable, and effective and performed with relative ease.

## Malabsorptive procedures

Malabsorptive procedures induce decreased small intestinal absorption of nutrients and calories by bypassing or excluding intestinal loops. Such decrease in functional absorptive surface area of the small intestine represents surgically induced short-gut syndrome and results in a negative energy balance and weight loss. Weight loss caused by malabsorption is often accompanied by excessive protein calorie malnutrition and macro- and micronutrient deficiencies. This has been the Achilles' heel of these procedures, and their wide use has been limited by such metabolic side effects.

## Jejunioileal bypass

The jejunioileal bypass was the first widely performed operation designed for weight reduction (9). The procedure involved dividing the proximal jejunum, which was then attached to the ileum just proximal to the ileocecal valve, and therefore effectively bypassing most of the absorptive small intestine (Fig. 1A). Although relatively successful at inducing satisfactory weight loss, it was also associated with an unacceptable incidence of complications, which lead to the general abandonment of the procedure. Most of the severe complications arose from bacterial overgrowth in the bypassed or blind segment of the small intestine. Many patients developed severe complications, including oxalate kidney stones, polyarthralgia, cirrhosis, hepatic failure, and bypass enteritis and metabolic derangements such as metabolic bone disease and vitamin B<sub>12</sub> and vitamin D deficiency, that required surgical revision or reversal (10–15). Although no longer performed, there are still survivors of jejunioileal bypass alive today. Such patients are in need of lifelong surveillance of metabolic, hepatic, and renal function. Patients who demonstrate organ

From the Care Group, Harvard Medical School, Beth Israel Deaconess Medical Center, Boston, Massachusetts.

Address correspondence and reprint requests to Edward C. Mun, MD, Harvard Medical School, Care Group, Beth Israel Deaconess Medical Center, Boston, MA 02215. E-mail: emun@caregroup.harvard.edu.

Received for publication 23 July 2004 and accepted in revised form 29 September 2004.

E.C.M. has received consulting fees from GI Dynamics and Ethicon Endo-Surgery.

© 2005 by the American Diabetes Association.

Table 1—BMI

|                      | Obesity Class | BMI (kg/m <sup>2</sup> ) |
|----------------------|---------------|--------------------------|
| Underweight          |               | <18.5                    |
| Normal               |               | 18.5–24.9                |
| Overweight           |               | 25.0–29.9                |
| Obesity              | I             | 30.0–34.9                |
| Severe obesity       | II            | 35.0–39.9                |
| Morbid obesity       | III           | 40.0–49.9                |
| Super-morbid obesity | III           | >50.0                    |

dysfunction may require an operative revision (16).

### Biliopancreatic diversion and duodenal switch

Biliopancreatic diversion and duodenal switch are other malabsorptive procedures and were developed to avoid the complications of the blind loop. The bil-

Table 2—Comorbidity

|                                                                                 |
|---------------------------------------------------------------------------------|
| Coronary artery disease                                                         |
| Hypertension                                                                    |
| Dyslipidemia                                                                    |
| Hypercholesterolemia, hypertriglyceridemia, hyperlipidemia                      |
| Type 2 diabetes                                                                 |
| Asthma                                                                          |
| Obesity hypoventilation syndrome                                                |
| Obstructive sleep apnea                                                         |
| Gastroesophageal reflux                                                         |
| Heartburn, reflux esophagitis                                                   |
| Hepatobiliary dysfunction                                                       |
| Fatty liver, cholelithiasis, nonalcoholic steatohepatitis                       |
| Stress urinary incontinence                                                     |
| Venous stasis disease                                                           |
| Ulcer(s), deep vein thrombosis, pulmonary embolus, superficial thrombophlebitis |
| Hernias                                                                         |
| Inguinal, ventral, umbilical, incisional                                        |
| Sexual hormone dysfunction                                                      |
| Irregular menstruation, hirsutism, gynecomastia, infertility                    |
| Cancer                                                                          |
| Colon, prostate, uterine, breast                                                |
| Infection                                                                       |
| Cellulitis, panniculitis, postoperative wound infections                        |
| Degenerative joint disease, osteoarthritis                                      |
| Migraine headache                                                               |
| Pseudotumor cerebri (idiopathic intracranial hypertension)                      |
| Clinical depression                                                             |

Table 3—Surgical criteria

| Criteria for bariatric surgery                                                                                    |
|-------------------------------------------------------------------------------------------------------------------|
| BMI $\geq 40$ kg/m <sup>2</sup> or BMI $\geq 35$ kg/m <sup>2</sup> with significant obesity-related comorbidities |
| Age between 16 and 65 years                                                                                       |
| Acceptable operative risks                                                                                        |
| Documented failure at nonsurgical approaches to long-term weight loss                                             |
| A psychologically stable patient with realistic expectations                                                      |
| A well-informed and motivated patient                                                                             |
| Commitment to prolonged lifestyle changes                                                                         |
| Supportive family/social environment                                                                              |
| Commitment to long-term follow-up                                                                                 |
| Resolution of alcohol or substance abuse                                                                          |
| Absence of active schizophrenia and untreated severe depression                                                   |

ioipancreatic diversion operation involves performing a distal (80%) gastrectomy and a Roux-en-Y reconstruction consisting of a 200-cm alimentary (food) limb, a long biliopancreatic (bile and pancreatic juice) limb, and a 50-cm common limb (17) (Fig. 1B). Significant weight loss occurs in these patients due to inadequate digestion of food in the common limb because of the short segment of common limb where mixing of food and digestive enzymes occur. The duodenal switch is similar to the biliopancreatic diversion but also includes a sleeve gastrectomy and duodenoileostomy to avoid the complication of marginal ulcer often seen in biliopancreatic diversion (18,19) (Fig. 1C). Isolated sleeve gastrectomy has been successfully used as a first-stage procedure in high-risk super-obese patients before more definitive surgical treatment at a later date (20). Despite excellent long-term weight loss and improvement in comorbid conditions following these procedures, concerns regarding long-term complications (protein calorie malnutrition, metabolic bone disease, hepatic dysfunction, and vitamin deficiencies) still exist (21). This combined with the fact that relatively few centers perform these procedures renders them investigational (22).

### Restrictive procedures

All restrictive procedures share one common feature that decreases the storage capacity of the stomach. A small stomach pouch is associated with prompt filling by a small amount of food, early satiety, de-

creased meal size, and calorie intake, ultimately resulting in weight loss. Purely restrictive procedures do not involve alterations in the small bowel anatomy and are therefore rarely associated with metabolic complications. Roux-en-Y gastric bypass is primarily a restrictive operation in which a small upper stomach pouch is fashioned, but the additional modification of the small intestine makes it a unique procedure with multiple mechanisms for weight loss. These restrictive procedures are in general simpler to perform with less procedural risks when compared with malabsorptive operations and achieve good weight loss. This reduction in mortality and major complications has led to their current popularity.

### Vertical banded gastroplasty

The vertical banded gastroplasty represents a purely restrictive procedure in that the stomach is partitioned using a surgical stapling device to create a very small proximal pouch. A mesh band is placed as reinforcement around the stoma between the pouch and the gastric remnant, thus effectively limiting food passage into the body of the stomach (23) (Fig. 2A). Filling of the upper stomach pouch results in satiety, and decreased solid food consumption leads to weight loss. Follow-up after vertical banded gastroplasty and comparison with other bariatric procedures exist. Several studies have demonstrated complications such as staple-line dehiscence and stomal stenosis, as well as inferior long-term weight loss after gastroplasty, when compared with Roux-en-Y gastric bypass (24–27). Weight loss outcomes are conventionally reported in terms of excess weight loss, where excess weight is defined as the difference between a person's actual and ideal body weight. Results following gastroplasty demonstrate an average 5-year excess weight loss of between 30 and 50%. As a result of unfavorable comparisons between vertical banded gastroplasty and gastric bypass in terms of both inferior weight loss and resolution of comorbidities, the vertical banded gastroplasty has fallen into disfavor among most surgeons (28–30). A newer and safer restrictive procedure, the laparoscopic adjustable gastric band, has helped to further push the vertical banded gastroplasty out of fashion.

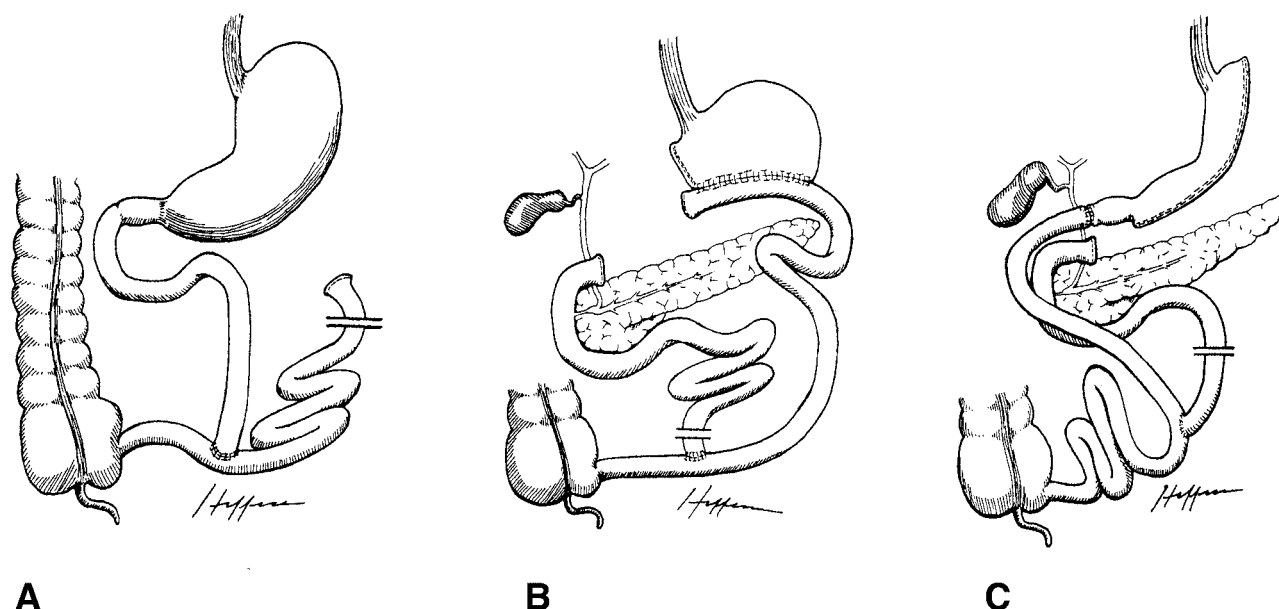

**Figure 1**—Malabsorptive procedures. A: Jejunioleal bypass (purely malabsorptive); B: Biliopancreatic diversion (primarily malabsorptive); and C: Biliopancreatic diversion with duodenal switch (primarily malabsorptive).

### Gastric band

Gastric banding represents the least invasive among frequently performed bariatric procedures. Although available and widely used abroad for a decade, the FDA (Food and Drug Administration) approved a single device for implantation in the U.S. in 2001 (LAP-BAND; Inamed Health, Santa Barbara, CA). The device consists of a sili-

con elastomer with an adjustable inner balloon that effectively allows for control of stomal aperture (Fig. 2B). The band encircles the proximal stomach to create a very small (15- to 20-ml) pouch that effectively restricts the amount of food ingested without re-routing the remainder of the gastrointestinal tract. Adjustments are later performed at the bedside by needle ac-

cessing of the subcutaneous port, which is sutured to the abdominal wall fascia.

The gastric band procedure is performed under a general anesthetic. The laparoscopic approach is standard, with a very low reported conversion rate to an open procedure (0–3.1%) (31–33). Among all bariatric procedures, mortality is the lowest following gastric band (0–0.7%) (34,35). Although early complica-

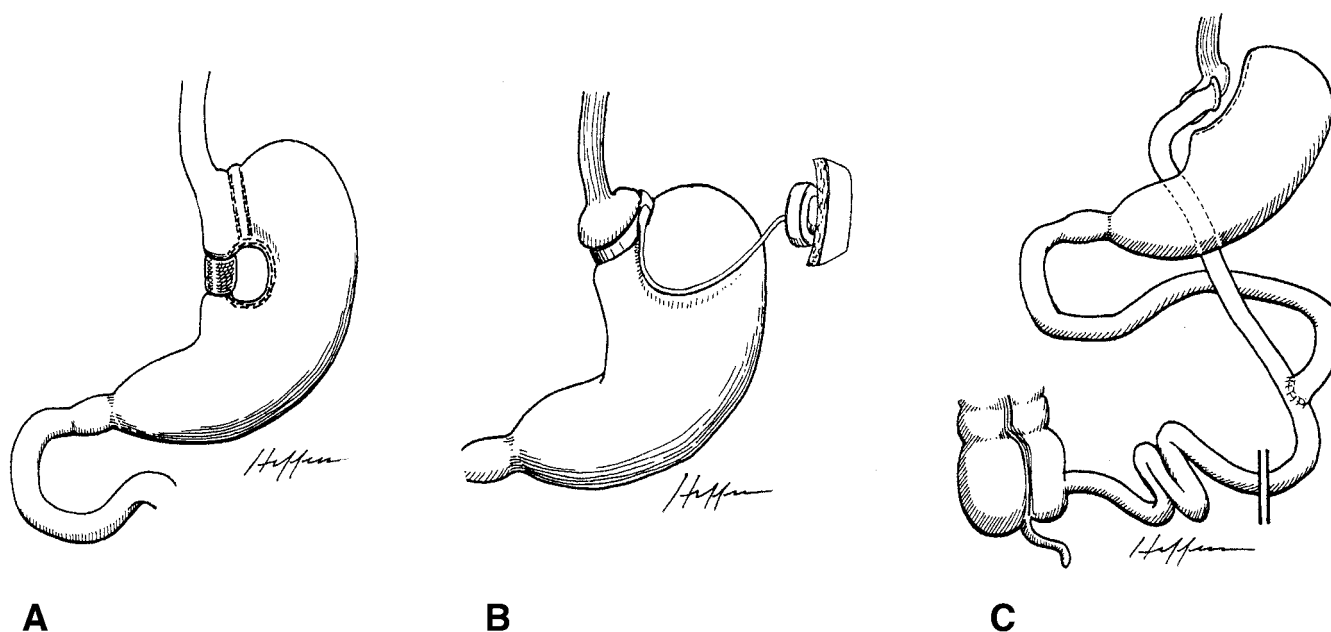

**Figure 2**—Restrictive procedures. A: Vertical banded gastroplasty (purely restrictive); B: Laparoscopic adjustable gastric band (purely restrictive); and C: Roux-en-Y gastric bypass (primarily restrictive).

tions are uncommon, late complications may be seen. One to 13% of patients will require revision of their band (33,36,37). Band prolapse or slipping of the band from its intended site may occur in 2–14.2% of patients (31,38). Erosion of the band into the gastric wall may occur in as many as 2.8% of patients (34).

Despite international data demonstrating acceptable weight loss and improvement of comorbid conditions, the device has only been slowly adopted in the U.S. Early U.S. data were discouraging both in terms of weight loss and complications. These initial outcomes may have been somewhat tainted because U.S. surgeons were working to determine the optimal operative technique and follow-up regimen. A growing body of evidence suggests that U.S. patients may expect outcomes similar to those attained worldwide (39). More recent trials show improved weight loss with decreased complication rates. Average excess weight loss has been reportedly 34.5–58% at 12 months, 36–87% at 24 months, 36.2–64% at 36 months, and 44–58.8% at 48 months (32,38,40,41). An emerging series (42) demonstrates that weight loss appears to have long-term durability. In addition to weight loss, improvement in comorbidities (asthma, triglyceridemia, and hypertension) has been established following gastric banding (43). Type 2 diabetes resolves in 54–65% of patients, with demonstrable improvement in both insulin sensitivity and  $\beta$ -cell function (44–46). As a result of both international and U.S. efforts, the adjustable gastric band is emerging as a safe and effective alternative to other operations in the treatment of morbidly obese patients.

### Gastric bypass

Since its conception in 1967, the gastric bypass has undergone a number of technical refinements (47). More recently, surgeons have applied laparoscopic techniques to accomplish the same procedure in an effort to reduce pain, incisional hernia, and wound infection and improve quality of life (48,49). In its current form, the operation entails creation of a very small pouch that is divided from the remainder of the stomach (Fig. 2C). This effectively restricts the size of a meal that a patient is able to ingest. Additionally, the configuration of the intestinal reconstruction bypasses a portion of the intestine, creating some degree malabsorption, and

may result in dumping symptoms. The later phenomenon may occur following ingestion of a meal high in carbohydrates and may result in diaphoresis, nausea, palpitations, diarrhea, abdominal pain, or lightheadedness (50). For patients struggling to avoid sweets, this negative reinforcement may be advantageous. In addition, more recent studies show that changes in metabolically important gut hormones such as ghrelin occur after gastric bypass. Bypassing of the fundus of the stomach, which is the major production site of the orexigenic hormone ghrelin, results in a significant decrease in its serum level and, in turn, the patient's appetite (51,52). Such a decrease in ghrelin levels has not been observed in other bariatric procedures (53). Thus, in addition to physically restricting the amount of food ingested, gastric bypass may provide other mechanisms of weight loss.

Complications reported by bariatric surgical centers demonstrate a mortality rate of 1% and an early complication rate of 10% following gastric bypass (16). Frequent complications may include gastrointestinal leak, thromboembolic events, bleeding, anastomotic stricture, incisional or internal hernia, marginal ulceration, vitamin and protein malnutrition, gallstone formation, and wound infection (Table 4). Many such complications following laparoscopic gastric bypass may be reduced once the surgeon has ascended the significant "learning curve" necessary to master the technical demands of the procedure (54). Furthermore, the potential for long-term vitamin and mineral abnormalities necessitates life-long follow-up of patients in order to avoid deficiencies in calcium, iron, thiamine, folate, and vitamin B<sub>12</sub>.

Maintenance of long-term weight loss has been well documented following gastric bypass. Although only short-term data are currently available following laparoscopic gastric bypass (68–80% excess weight loss at 12–60 months), durable long-term excess weight loss has been described following open gastric bypass (49–62% excess weight loss at 10–14 years) (55–60). Resolution of comorbid conditions following gastric bypass has been well established (Table 5). The majority of patients with type 2 diabetes (82.9%) or glucose intolerance (98.7%) will experience normalization of glucose, HbA<sub>1c</sub>, and insulin levels (56). Other comorbid conditions, such as hyperten-

**Table 4—Complications following weight loss surgery**

|                                             |           |
|---------------------------------------------|-----------|
| Laparoscopic gastric bypass                 |           |
| Anastomotic leak                            | 0–4.4%    |
| Deep vein thrombosis/<br>pulmonary embolism | 0–1.3%    |
| Symptomatic cholelithiasis                  | 0–3.8%    |
| Bleeding                                    | 0.6–4%    |
| Anastomotic stricture                       | 2.0–11.4% |
| Bowel obstruction                           | 2.9–10.5% |
| Incisional hernia                           | 0–1.8%    |
| Wound infection                             | 0–8.7%    |
| Internal hernia                             |           |
| Conversion to open<br>procedure             | 0–8%      |
| Mortality                                   | 0–3.3%    |
| Laparoscopic adjustable<br>gastric band     |           |
| Gastric prolapse                            | 2.2–24%   |
| Gastric outlet obstruction                  | 0–14%     |
| Esophageal dilation                         | 0–71%     |
| Gastric band erosion                        | 0–2.8%    |
| Device leak                                 | 0.4–7%    |
| Infection                                   | 0.3–8.8%  |
| Need for revision                           | 1–13.5%   |
| Conversion to open<br>procedure             | 0–3.1%    |
| Mortality                                   | 0–0.7%    |

Data from selected series data (31–35,37,41,57–61,63–72).

sion (52–91.5%), sleep apnea (74–97.8%), and hypercholesterolemia (63–97%), also have been noted to resolve (57,58,61).

All weight loss surgical procedures achieve profound weight loss in morbidly obese patients, regardless of their mechanism of action. The extent weight loss is far greater than most medical therapies

**Table 5—Outcomes following laparoscopic gastric bypass**

|                                                  |          |
|--------------------------------------------------|----------|
| Excess weight loss (>12 months)                  | 68–80.4% |
| Resolution of type 2 diabetes                    | 50–98%   |
| Resolution of hypertension                       | 36–70%   |
| Resolution of gastroesophageal<br>reflux disease | 52–98%   |
| Resolution of stress urinary<br>incontinence     | 44–88%   |
| Resolution of obstructive sleep<br>apnea         | 74–100%  |
| Resolution of hypercholes-<br>terolemia          | 63%      |
| Improvement in osteoarthritis<br>pain            | 41–76%   |

Data from selected series data (31–35,37,41,57–61,63–72).



can provide and is usually more than adequate to reverse many of the comorbid conditions found in these patients. Roux-en-Y gastric bypass has been shown by numerous studies to improve or resolve glucose intolerance and type 2 diabetes in the majority of patients. Such improvement often occurs almost immediately following surgery and well before weight loss is observed (56,62). Bypassing of the foregut area (body of stomach, duodenum, and proximal jejunum) appears to be the key anatomical change associated with such rapid improvement in insulin sensitivity. Gastric banding also results in significant improvement and resolution of glucose intolerance and diabetes; however, such improvement is usually gradual and is associated with weight loss (46). From these observations, it is clear that interruption of intestinal signaling may help explain the rapid resolution in diabetes following gastric bypass in contrast to purely restrictive procedures such as the vertical banded gastroplasty or gastric band.

Until medical and pharmacologic therapies are developed to better address the growing obesity epidemic, surgical solutions are the best option for many morbidly obese patients. Future research emphasis is necessary to optimize postoperative outcomes and to further improve patient safety.

**Acknowledgments**—Figures 1 and 2 are taken from ref. 16 with permission granted from Elsevier.

## References

- Mokdad AH FE, Bowman BA, Dietz WH, Vinicor F, Bales VS, Marks JS: Prevalence of obesity, diabetes, and obesity-related health risk factors, 2001. *JAMA* 289:76–79, 2003
- Flegal KM, Carroll MD, Ogden CL, Johnson CL: Prevalence and trends in obesity among US adults, 1999–2000. *JAMA* 286:1723–1727, 2002
- Wolf A, Colditz G: Current estimates of the economic cost of obesity in the United States. *Obes Res* 6:97–106, 1998
- Peeters ABJ, Willekens F, Mackenbach JP, Mamun AA, Bonneux L: Obesity in adulthood and its consequences for life expectancy: a life-table analysis. *Ann Intern Med* 138:24–33, 2003
- Allison DB, Fontaine KR, Manson JE, Stevens J, VanItallie TB: Annual deaths attributable to obesity in the United States. *JAMA* 282:1530–1538, 1999
- National Heart, Lung and Blood Institute Obesity Education Initiative Expert Panel on the Identification, Evaluation, and Treatment of Overweight and Obesity in Adults: *Clinical Guidelines on the Identification, Evaluation, and Treatment of Overweight and Obesity in Adults: The Evidence Report*. Bethesda, MD, U.S. Department of Health and Human Services, 1998
- Consensus Development Conference Panel: NIH conference: gastrointestinal surgery for severe obesity. *Ann Intern Med* 115:956–961, 1991
- Steinbrook R: Surgery for severe obesity. *N Engl J Med* 1075–1079, 2004
- Payne JH, DeWind LT: Surgical treatment of obesity. *Am J Surg* 118:141–147, 1969
- Deitel M, Shahi B, Anand PK, Deitel FH, Cardinell DL: Long-term outcome in a series of jejunoileal bypass patients. *Obes Surg* 3:247–252, 1993
- Clayman RV, Williams RD: Oxalate urolithiasis following jejunoileal bypass. *Surg Clin North Am* 59:1071–1074, 1979
- Kroyer JM, Talbert WM Jr: Morphologic liver changes in intestinal bypass patients. *Am J Surg* 139:855–859, 1980
- Halverson JD, Wise L, Wazna MF, Ballinger WF: Jejunoileal bypass for morbid obesity: a critical appraisal. *Am J Med* 64:461–475, 1978
- Griffen WO Jr, Young VL, Stevenson CC: A prospective comparison of gastric and jejunoileal bypass procedures for morbid obesity. *Ann Surg* 186:500–509, 1977
- Requarth JA BK, Colacchio TA, Stukel TA, Mott LA, Greenberg ER, Weismann RE: Long-term morbidity following jejunoileal bypass: the continuing potential need for surgical reversal. *Arch Surg* 130:318–325, 1995
- Mun EC, Blackburn GL, Matthews JB: Current status of medical and surgical therapy for obesity. *Gastroenterology* 120:669–681, 2001
- Scopinaro N, Gianetta E, Adami GF, Friedman D, Traverso E, Marinari GM, Cuneo S, Vitale B, Ballari F, Colombini M, Baschieri G, Bachi V: Biliopancreatic diversion for obesity at eighteen years. *Surgery* 119:261–268, 1996
- Hess DS, Hess DW: Biliopancreatic diversion with a duodenal switch. *Obes Surg* 8:267–282, 1998
- Marceau P, Hould FS, Simard S, Lebel S, Bourque RA, Potvin M, Biron S: Biliopancreatic diversion with duodenal switch. *World J Surg* 22:947–954, 1998
- Regan JP, Inabnet WB, Gagner M, Pomp A: Early experience with two-stage laparoscopic Roux-en-Y gastric bypass as an alternative in the super-super obese patient. *Obes Surg* 13:861–864, 2003
- Murr MM, Balsiger BM, Kennedy FP, Mai JL, Sarr MG: Malabsorptive procedures for severe obesity: comparison of pancreaticobiliary bypass and very very long limb Roux-en-Y gastric bypass. *J Gastrointest Surg* 3:607–612, 1999
- Jones DB, Provost DA, DeMaria EJ, Smith CD, Morgenstern L, Schirmer B: Optimal management of the morbidly obese patient SAGES appropriateness conference statement. *Surg Endosc* 18:1029–1037, 2004
- Mason EE: Vertical banded gastroplasty for obesity. *Arch Surg* 117:701–706, 1982
- Nightengale ML, Sarr MG, Kelly KA, Jensen MD, Zinsmeister AR, Palumbo PJ: Prospective evaluation of vertical banded gastroplasty as the primary operation for morbid obesity. *Mayo Clin Proc* 66:773–782, 1991
- Sugerman HJ, Starkey JV, Birkenhauer R: A randomized prospective trial of gastric bypass versus vertical banded gastroplasty for morbid obesity and their effects on sweets versus non-sweets eaters. *Ann Surg* 205:613–624, 1987
- Howard L, Malone M, Michalek A, Carter J, Alger S, Van Woert J: Gastric bypass and vertical banded gastroplasty: a prospective randomized comparison and 5-year follow-up. *Obes Surg* 5:55–60, 1995
- Balsiger BM, Poggio JL, Mai J, Kelly KA, Sarr MG: Ten and more years after vertical banded gastroplasty as primary operation for morbid obesity. *J Gastrointest Surg* 4:598–605, 2000
- Sugerman HJ, Londrey GL, Kellum JM, Wolf L, Liska T, Engle KM, Birkenhauer R, Starkey JV: Weight loss with vertical banded gastroplasty and Roux-Y gastric bypass for morbid obesity with selective versus random assignment. *Am J Surg* 157:93–102, 1989
- MacLean LD, Rhode BM, Forse RA, Nohr R: Surgery for obesity: an update of a randomized trial. *Obes Surg* 5:145–150, 1995
- Hall JC, Watts JM, O'Brien PE, Dunstan RE, Walsh JF, Slavotinek AH, Elmslie RG: Gastric surgery for morbid obesity: the Adelaide Study. *Ann Surg* 211:419–427, 1990
- Rubenstein R: Laparoscopic adjustable gastric banding at a US center with up to 3-year follow-up. *Obes Surg* 12:380–384, 2002
- Dargent J: Laparoscopic adjustable gastric banding: lessons from the first 500 patients in a single institution. *Obes Surg* 9:446–452, 1999
- Angrisani L, Furbetta F, Doldi SB, Basso N, Lucchese M, Giacomelli F, Zappa M, Di Cosmo L, Veneziani A, Turicchia GU, Alkilani M, Forestieri P, Lesti G, Puglisi F, Toppino M, Campanile F, Capizzi FD, D'Atri C, Sciptoni L, Giardiello C, Di Lorenzo N, Lacitignola S, Belvederesi N, Marzano B, Bernate P, Iuppa A, Borrelli V, Lorenzo M: Lap Band adjustable gastric

- banding system: the Italian experience with 1863 patients operated on 6 years. *Surg Endosc* 17:409–412, 2003
34. O'Brien PE, Dixon JB, Brown W, Schachter LM, Chapman L, Burn AJ, Dixon ME, Scheinkestel C, Halket C, Sutherland LJ, Korin A, Baquie P: The laparoscopic adjustable gastric band (Lap-Band): a prospective study of medium-term effects on weight, health and quality of life. *Obes Surg* 12:652–660, 2002
35. Food and Drug Administration: FDA trial summary of safety and effectiveness data: the Lap-Band Adjustable Gastric Banding System (P000008) [article online], 2001. Available at <http://www.fda.gov/cdrh/pdf/p000008.htm>. Accessed 1 September 2004
36. O'Brien PE, Dixon JB: Weight loss and early and late complications: the international experience. *Am J Surg* 184:42S–45S, 2002
37. Cadiere GB HJ, Hainaux B, Gaudissart O, Favretti S, Segato G: Laparoscopic adjustable gastric banding. *Semin Laparosc Surg* 9:105–114, 2002
38. Weiner R, Blanco-Engert R, Weiner S, Matkowitz R, Schaefer L, Pomhoff I: Outcome after laparoscopic adjustable gastric banding: 8 years experience. *Obes Surg* 13:427–434, 2003
39. Schneider B, Sanchez V, Jones D: How to implant the laparoscopic adjustable gastric band for morbid obesity. *Contemp Surg* 60:248–264, 2004
40. DeMaria EJ, Sugerman HJ, Meador JG, Doty JM, Kellum JM, Wolfe L, Szucs RA, Turner MA: High failure rate after laparoscopic adjustable silicone gastric banding for treatment of morbid obesity. *Ann Surg* 233:809–818, 2001
41. Ren CJ, Horgan S, Ponce J: US experience with the LAP-BAND system. *Am J Surg* 184:46S–50S, 2002
42. Favretti F, Cadiere GB, Segato G, Himpen J, De Luca M, Busetto L, De Marchi F, Foletto M, Caniato D, Lise M, Enzi G: Laparoscopic banding: selection and technique in 830 patients. *Obes Surg* 12:385–390, 2002
43. Dixon JB, Chapman L, O'Brien P: Marked improvement in asthma after Lap-Band surgery for morbid obesity. *Obes Surg* 9:385–389, 1999
44. Dixon JB, O'Brien PE: Health outcomes of severely obese type 2 diabetic subjects 1 year after laparoscopic adjustable gastric banding. *Diabetes Care* 25:358–363, 2002
45. Dolan K, Bryant R, Fielding G: Treating diabetes in the morbidly obese by laparoscopic gastric banding. *Obes Surg* 13:439–443, 2003
46. Dixon JB, Dixon AF, O'Brien PE: Improvements in insulin sensitivity and beta-cell function (HOMA) with weight loss in the severely obese: homeostatic model assessment. *Diabet Med* 20:127–134, 2003
47. Mason EE, Ito C: Gastric bypass. *Ann Surg* 170:329–339, 1969
48. Wittgrove AC, Clark GW, Tremblay LJ: Laparoscopic gastric bypass, Roux-en-Y: preliminary report of five cases. *Obes Surg* 4:353–357, 1994
49. Schneider BE, Villegas L, Blackburn GL, Mun EC, Critchlow JF, Jones DB: Laparoscopic gastric bypass surgery: outcomes. *J Laparoendosc Adv Surg Tech A* 13:247–255, 2003
50. Kellum JM, Kuemmerle JF, O'Dorisio TM, Rayford P, Martin D, Engle K, Wolf L, Sugerman HJ: Gastrointestinal hormone responses to meals before and after gastric bypass and vertical banded gastroplasty. *Ann Surg* 211:763–770, 1990 [discussion 770–771]
51. Tritos N, Mun EC, A B, Grayson R, Maratos-Flier E, Goldfine A: Serum ghrelin levels in response to glucose load in obese subjects post-gastric bypass surgery. *Obes Res* 8:919–924, 2003
52. Cummings DE, Weigle DS, Frayo RS, Breen PA, Ma MK, Dellinger EP, Purnell JQ: Plasma ghrelin levels after diet-induced weight loss or gastric bypass surgery. *N Engl J Med* 346:1623–1630, 2003
53. Leonetti F, Silecchia G, Iacobellis G, Ribaud MC, Zappaterreno A, Tiberti C, Iannucci CV, Perrotta N, Bacci V, Basso MS, Basso N, Di Mario U: Different plasma ghrelin levels after laparoscopic gastric bypass and adjustable gastric banding in morbidly obese subjects. *J Clin Endocrinol Metab* 88:4227–4231, 2003
54. Schauer P, Ikramuddin S, Hamad G, Gourash W: The learning curve for laparoscopic Roux-en-Y gastric bypass is 100 cases. *Surg Endosc* 17:212–215, 2003
55. Jones KB Jr: Experience with the Roux-en-Y gastric bypass, and commentary on current trends. *Obes Surg* 10:183–185, 2000
56. Pories WJ, Swanson MS, MacDonald KG, Long SB, Morris PG, Brown BM, Barakat HA, deRamon RA, Israel G, Dolezal JM, et al: Who would have thought it? An operation proves to be the most effective therapy for adult-onset diabetes mellitus. *Ann Surg* 222:339–350, 1995 [discussion 350–352]
57. Wittgrove AC, Clark GW: Laparoscopic gastric bypass, Roux-en-Y: 500 patients: technique and results, with 3–60 month follow-up. *Obes Surg* 10:233–239, 2000
58. Schauer PR, Ikramuddin S, Gourash W, Ramanathan R, Luketich J: Outcomes after laparoscopic Roux-en-Y gastric bypass for morbid obesity. *Ann Surg* 232:515–529, 2000
59. Nguyen NT, Goldman C, Rosenquist CJ, Arango A, Cole CJ, Lee SJ, Wolfe BM: Laparoscopic versus open gastric bypass: a randomized study of outcomes, quality of life, and costs. *Ann Surg* 234:279–289, 2001 [discussion 289–291]
60. Papasavas PK, Hayetian FD, Caushaj PF, Landreneau RJ, Maurer J, Keenan RJ, Quinlin RF, Gagne DJ: Outcome analysis of laparoscopic Roux-en-Y gastric bypass for morbid obesity: the first 116 cases. *Surg Endosc* 16:1653–1657, 2002
61. DeMaria EJ, Sugerman HJ, Kellum JM, Meador JG, Wolfe LG: Results of 281 consecutive total laparoscopic Roux-en-Y gastric bypasses to treat morbid obesity. *Ann Surg* 235:640–645, 2002 [discussion 645–647]
62. Schauer PR, Burguera B, Ikramuddin S, Cottam D, Gourash W, Hamad G, Eid GM, Mattar S, Ramanathan R, Barinas-Mitchel E, Rao RH, Kuller L, Kelley D: Effect of laparoscopic Roux-en-Y gastric bypass on type 2 diabetes mellitus. *Ann Surg* 238:467–484, 2003
63. Westling A, Gustavsson S: Laparoscopic vs open Roux-en-Y gastric bypass: a prospective, randomized trial. *Obes Surg* 11:284–292, 2001
64. Nguyen NT, Ho HS, Palmer LS, Wolfe BM: A comparison study of laparoscopic versus open gastric bypass for morbid obesity. *J Am Coll Surg* 191:149–155, 2000 [discussion 155–157]
65. Higa KD, Boone KB, Ho T: Complications of the laparoscopic Roux-en-Y gastric bypass: 1,040 patients: what have we learned? *Obes Surg* 10:509–513, 2000
66. Lujan JA, Hernandez Q, Frutos MD, Valero G, Cuenca JR, Parrilla P: Laparoscopic gastric bypass in the treatment of morbid obesity: preliminary results of a new technique. *Surg Endosc* 16:1658–1662, 2002
67. de la Torre RA, Scott JS: Laparoscopic Roux-en-Y gastric bypass: a totally intra-abdominal approach: technique and preliminary report. *Obes Surg* 9:492–498, 1999
68. Matthews BD, Sing RF, DeLegge MH, Ponsky JL, Heniford BT: Initial results with a stapled gastrojejunostomy for the laparoscopic isolated roux-en-Y gastric bypass. *Am J Surg* 179:476–481, 2000
69. Weiner R, Wagner D, Bockhorn H: Laparoscopic gastric banding for morbid obesity. *J Laparoendosc Adv Surg Tech A* 9:23–30, 1999
70. Fielding GA, Rhodes M, Nathanson LK: Laparoscopic gastric banding for morbid obesity: surgical outcome in 335 cases. *Surg Endosc* 13:550–554, 1999
71. Belachew M, Belva PH, Desai C: Long-term results of laparoscopic adjustable gastric banding for the treatment of morbid obesity. *Obes Surg* 12:564–568, 2002
72. DeMaria EJ: Laparoscopic adjustable silicone gastric banding. *Surg Clin North Am* 81:1129–1144, vii, 2001
